# Supplementary material for: Direct Molecular Detection and Genotyping of Borrelia burgdorferi from Whole Blood of Patients with Early Lyme Disease
Source: PLoS One. 2012 May 8;7(5):e36825. doi: 10.1371/journal.pone.0036825 (PMC3348129; doi:10.1371/journal.pone.0036825)
Supplement: Table S1 — Borrelia isothermal amplification primers. Primer sequences used during the isothermal amplification of Borrelia DNA for each of the seven regions targeted. (XLSX) [file pone.0036825.s001.xlsx]

## Sheet: Sheet1
Table S1: Borrelia isothermal amplification primers
Primer Pair Target	Gene Target	Primer	Sequence 3'-5'
BCT3514	rpoC	3514E3-F1	CCGAAAAAGATGGGCTTTT
		3514E3-F2	AGGTTAAAAAGTCCGAAACTATT
		3514E3-F3	TCTCCCGATCAAATTAGAAATTG
		3514E3-F4	AAAGAGATAAAAGATTTTGAAAGAATAAA
		3514E3-F5	AAAGCTAGGTTTTTGGAGTTTT
		3514E3-F6	ACAGAAAAAGAAGAAGAATTGATTAA
		3514E3-F7	ATGATGCTGGGAATCAGGTTC
		3514E3-F8	GGGCTTGGACTTGATTTG
		3514E3-F9	GTCTTTTAATGTGCTAATGCAAGA
		3514E3-F10	GCGTTCCTACTAATGTATCAGGG
		3514E3-F11	GGCAGAGTTAAAATATATGAAAATATAG
		3514E3-F12	CACCCTTCAAGAACTTTTAACAG
		3514E3-F13	GGCTCTTGAAGCTTATGG
		3514E3-F14	AGACTTGGAGAAATGGAGG
		3514E3-F15	GAGGAAAGGCTCAATTTGG
		3514E3-F16	TCTTGTTTCTCAGCAACCT
		3514E3-F17	CGCAAGATCAACAGGC
		3514E3-F18	ACTACACCATCTTGTTGATGATA
		3514E3-F19	GTAATGGTTGGGGTGATTTAC
		3514E3-F20	GGAGAGCCGTTCGAAA
		3514E3-F21	CCAACTTCTAAAGAAATTTTATATGATGG
		3514E3-F22	AGGAAAAATTAAAAACTGCTGGA
		3514E3-F23	TGTTTTTGAATCTGCTACAAATGA
		3514E3-F24	CTGGTAAATATCTTGGTGAATCTTATAA
		3514E3-F25	GGACAGTTAATGGAATCTCAAT
		3514E3-R1	ATACCAAATATGAGCAACTGGGGC
		3514E3-R2	AAGCCCAATCCTAGAGGGTA
		3514E3-R3	TAGAATTCAAACTAGATGCTGTAAT
		3514E3-R4	CGGTTCAATTACTACATATTTTTCATA
		3514E3-R5	GCCCGGTTCAATTACTACA
		3514E3-R6	TCTTCATTTAAAAGCTGCATTTTT
		3514E3-R7	GCTCTCTAGCTTCTATGTACTCA
		3514E3-R8	AAGCATTAAAAGACATACCATATCGC
		3514E3-R9	GAAGAGTTTTAATAGCCTCAGCCC
		3514E3-R10	GACGAAAGCTCATCAAGATCA
		3514E3-R11	CAGTTTTATCATCTTTATCTATCATTTGAA
		3514E3-R12	AAATTCTCAATAATTTCAAGACGTCTT
		3514E3-R13	ATCCACTCTGGCTTATTGCCA
		3514E3-R14	GGGGAATAACAGGAAGAAC
		3514E3-R15	GCTGAACCATTGGCC
		3514E3-R16	ATGTTGCAAAGCGCC
		3514E3-R17	CGATTATTTCTATTTATGACTCTTCTATAAAGATC
		3514E3-R18	GCATTAAGAAGAAGCAACTTTCT
		3514E3-R19	ATTCTTTTTTCGTTTCTCACAATAATC
		3514E3-R20	GTCAAAAAGAGAGTCTACTGATTC
		3514E3-R21	GAACCTTTGACAACCTTTCTTTTA
		3514E3-R22	CGACTTGAGAGGCCT
		3514E3-R23	CCTGCTTACCTTTTAATGCAT
		3514E3-R24	TTTTACCAAGAAGATTTTGCCTAA
		3514E3-R25	CAATAACAGAACGACCAGAATAA
BCT3515	rplB	3515E3-F1	GTGTTGCTATGAATCCTGTTG
		3515E3-F2	GGTAGAAGACCCAAGGT
		3515E3-F3	GGAAAGCTGGTAAAAGTAGG
		3515E3-F4	TGGAAATGAAGATTATGCCAATATTT
		3515E3-F5	TTTTTAAAAAATGTATTGCAACAATTGG
		3515E3-F6	TTATCATCTGGCGAGATGAG
		3515E3-F7	GACGGGAATTATGTCACTG
		3515E3-F8	GGTGGATATGCTATGATACTTG
		3515E3-F9	GGGTGGACAGCTTATAAGA
		3515E3-F10	CGTTCACAATATTGAGCTTAATGT
		3515E3-F11	CTTACCTCTTGAAAATATTCCTATTGG
		3515E3-F12	CTAATGCTCCAATTAAAATTGGC
		3515E3-F13	GGTTGGAGATGTTTTGGAAAG
		3515E3-F14	AAAGGTATATTATTTCTCCTAAAGGC
		3515E3-F15	GCTAATATAGCTTTGCTTGTTTATAAAG
		3515E3-F16	GTTGCTTCTATTGAATATGATCCTAA
		3515E3-F17	CGAAGAGATAAATTTAGCATTCCTG
		3515E3-F18	GCATAAGAGAAAGTATAGGTTGATTG
		3515E3-F19	CTGGTAGGATTAGTATTAGAAGAAGAG
		3515E3-F20	AAAAGGTAAAAAATTTAAATCGGGC
		3515E3-F21	CAAAGGTAATGATCCTTTGAAATC
		3515E3-F22	GCTATAAGACGACTTTATCTTTTGAT
		3515E3-F23	AGACTTATAAGCCAAAAACTTCTTC
		3515E3-F24	GGTTTTGGAGAAAAATAAATATGGG
		3515E3-F25	CAAAAAGGAAGATAAAATAGATATTTTTTAGTG
		3515E3-R1	TTTCTTGCGAGTCTTATAACCT
		3515E3-R2	TTTATTTCTTCTTTTAATAATAAATTTATCTGAATATC
		3515E3-R3	TTTTTTAATAGATCTTGCCACTATACTC
		3515E3-R4	ACTTTTTGATAAAGACTCTTTTCTATAAAAG
		3515E3-R5	CTTCTCACTTCCAAAAGACG
		3515E3-R6	AAGATCTGGAGTAGGTTTTAATAAC
		3515E3-R7	GGCTTACCATTTCAGGAATTAT
		3515E3-R8	AAGTTTTGCCATTGTAAACAGATAT
		3515E3-R9	CAAGATCCTCGGTAATATAAATAGGT
		3515E3-R10	CTCGCCAAGCTTATGTC
		3515E3-R11	CCTCTAAAAATCCTTGTAGGTG
		3515E3-R12	CCTCTAAAAATCCTTGTAGGTG
		3515E3-R13	CTTCCCTTTTTATCTGACTTAGC
		3515E3-R14	ATCTTCTATTTACCAACATAACTACTTAC
		3515E3-R15	AGGGTAAATTTTTGCCCTTTG
		3515E3-R16	CTATTGGCCTAACTTTTTTTGG
		3515E3-R17	AGACTCTCCCCGGATATT
		3515E3-R18	AAAGCACTGCAATAGCC
		3515E3-R19	TAAAAGCTTAGCTCCTTTATTAGG
		3515E3-R20	TGATGCTGCTGACTTAACAA
		3515E3-R21	CTCGGAAAGATTTTTATTGTGATACA
		3515E3-R22	CATCAACCATAACTGTTTTAACAAATATC
		3515E3-R23	GCCAAATCTTTTTACGACGAC
		3515E3-R24	TATCAGCTCTACCCCTAGC
		3515E3-R25	CTTCAACAAAAATATGACAATTTCTATTAAC
BCT3516	leuS	3516E3-F1	CCTATCCTTCTGCCAACG
		3516E3-F2	GGAAAAAAGATTGTATATACTTGACATG
		3516E3-F3	CAAAGTAGAAGAAGATCCAAGTATTC
		3516E3-F4	GGCAAGAATTTTGGGATAATAACA
		3516E3-F5	TGTCTAAATACGAATTCATAAAAATTGAAA
		3516E3-F6	GAATAAGTTGTTATGAGTTAATTTTCAAGA
		3516E3-F7	TAAATAAAATTAACAAAAATGCAATCTAAAAGAA
		3516E3-F8	CACAGCATCAAAATTGTTAGC
		3516E3-F9	CCGTGCTGGTTCAAG
		3516E3-F10	GAGGGGCTAGTGGG
		3516E3-F11	GGAAGTGGTAGACACGC
		3516E3-F12	AAAAAATATAATGGTTAATAGTGCTGTG
		3516E3-F13	GTAATTAAAAAAAATAAAAAAGTTGACAAAAATT
		3516E3-F14	CGCTGTAATAGCAACAACAATAATA
		3516E3-F15	AATAATATTTTCAAAAATAAAAATAATTATATTTGCAA
		3516E3-F16	CTCTAAGCTTCAAACTAGGTCA
		3516E3-F17	AACTTTGCTCTCAATAGTTGTTT
		3516E3-F18	TATGAAATCTAATCTATTTATTGTTTCTGACT
		3516E3-F19	GCAATATTTATGTCAGCAGGAA
		3516E3-F20	GAAGGTTTATACCCTTTGGAG
		3516E3-F21	TGGTCAATATGGGGTATTAACTTTAT
		3516E3-F22	CAATAACCTGCTTGACAAAATAAATTA
		3516E3-F23	GGAAATTAATGGGAAATAAATTATTTAAAAACA
		3516E3-F24	AGACATAATATCTTTTTACATTGGGAAA
		3516E3-F25	TTTAGGAATTTTTTGGGGAGC
		3516E3-R1	TGAGGGTGAGTTCCTGT
		3516E3-R2	TTGTTTTTTAAACTTATTAATATTTTCTTCTGTAC
		3516E3-R3	GGCAAACCCCAAAGC
		3516E3-R4	GTGTTCTAATTTCTCGATCCC
		3516E3-R5	ACTGTGTCCATTTATAGTAATTCTC
		3516E3-R6	CTAGCCCTTTTTTATATAATTGCAGG
		3516E3-R7	GTACCATACAGGCATTTCTTTTA
		3516E3-R8	CTAGTACCGTTCCAAGCT
		3516E3-R9	GTCCATCTGAAGTTTGAATAATCTC
		3516E3-R10	ACGCTGTAAGATCCTCTC
		3516E3-R11	GTAATTTTTAAAACCCACTGTCTTAAATA
		3516E3-R12	CGTCTAGCAATCTTTCAGC
		3516E3-R13	AGATTCAGGCCATTCTAATTCT
		3516E3-R14	TCCAATTTCGCTGCATTTC
		3516E3-R15	AATTCAATTTCAACTCCTGTTGAT
		3516E3-R16	TTTTATCGCTGTGGCCTT
		3516E3-R17	CTTTACAACAAGGCCAGAC
		3516E3-R18	CGATCACTAAATATGTGATGCC
		3516E3-R19	GTTGTTCTTTGTTATTTTTTCTATTAGTTTATT
		3516E3-R20	CTTCGTGCTTTACATATTTTAAAACATT
		3516E3-R21	GAGAAGTCCTATTAAGATCGCT
		3516E3-R22	CTGTGAAAACTCCCGATTTATC
		3516E3-R23	CATTTGTTATTGGATGAAATGCG
		3516E3-R24	GCTTCCAACCCAAATTG
		3516E3-R25	CGGTTCCGTAAGTTCCT
BCT3517	flaB	3517E3-F1	TCTGCTTCTCAAAATGTAAGAACA
		3517E3-F2	TAACCAAATGCACATGTTATCAAA
		3517E3-F3	TTGCTGATCAAGCTCAATAT
		3517E3-F4	GCAACTTACAGACGAAATTAAT
		3517E3-F5	AGACAGAGGTTCTATACAAATTGA
		3517E3-F6	AGGTAACGGCACATATTCAGA
		3517E3-F7	TAAGAATGAAGGAATTGGCAGTT
		3517E3-F8	AATTTAAATGAAGTAGAAAAAGTCTTAGT
		3517E3-F9	GGCTATTAATTTTATTCAGACAACAGA
		3517E3-F10	TTGTCACAAGCTTCTAGAAATA
		3517E3-F11	TTTCTGGTAAGATTAATGCTCAAAT
		3517E3-F12	GAGCTTCTGATGATGCTGCT
		3517E3-F13	GAAAAGCTTTCTAGTGGGTAC
		3517E3-F14	CATTAACGCTGCTAATCTTAGTAA
		3517E3-F15	CATCAGCTATTAATGCTTCAAGA
		3517E3-F16	CATGGAGGAATGATATATGATTATCATG
		3517E3-F17	TTTTTTTTTAATTTTTGTGCTATTCTTTTTAAC
		3517E3-F18	TAATAATAATTATTTTTAATGCTATTGCTATTTGC
		3517E3-F19	ATTAAAGGCTTTTGATTTTAATCAAAGA
		3517E3-F20	TTAAGCGCATGAAAGATCAAG
		3517E3-F21	GTGGAAGGTGAACTTAATACC
		3517E3-F22	GATTATAAAAAGAAGTACGAAGATAGAGAG
		3517E3-F23	TTATTTTTTTGATTAAAAATTTTCAAGTCGTAA
		3517E3-F24	GCTTCCGGAGGAGTTATTTAT
		3517E3-F25	TAGGAGATTGTCTGTCGC
		3517E3-R1	GCAACATTAGCTGCATAAATAT
		3517E3-R2	TCCCTCACCAGAGAAAAG
		3517E3-R3	ACACCCTCTTGAACCGGTG
		3517E3-R4	TGAGAAGGTGCTGTAGCAGG
		3517E3-R5	TTGTAACATTAACAGGAGAATTAACTC
		3517E3-R6	TTAGCAAGTGATGTATTAGCATCA
		3517E3-R7	TGATCACTTATCATTCTAATAGCATTT
		3517E3-R8	CTATTTTGGAAAGCACCTAAAT
		3517E3-R9	GCATACTCAGTACTATTCTTTATAGAT
		3517E3-R10	TGAGCATAAGATGCTTTTAGATTT
		3517E3-R11	TCTGTCATTGTAGCATCTTTTA
		3517E3-R12	TTAAAATACTATTAGTTGTTGCTGCTAC
		3517E3-R13	ATTAGCCTGCGCAATCAT
		3517E3-R14	GCAATGACAAAACATATTGGG
		3517E3-R15	TTAATACAATTTATACCAATTAAACTAGAATTTT
		3517E3-R16	ATAAAAAAACAAAAGATCCTTTAAAGGATC
		3517E3-R17	ATAAATTATACTAAAATTATTAAATTTTTGCCGAT
		3517E3-R18	GCCTGCATTATGCTTTATAACA
		3517E3-R19	CCTACTCAAAGCAAACTCC
		3517E3-R20	CGAAAATACTTTATAACAATCTTTAATTTTAACA
		3517E3-R21	TCGACTTATCTGCTTTTTGTTAAC
		3517E3-R22	CTATCTTTGCCATCTTCATAGTC
		3517E3-R23	GCAATAAAAATAGAAGATTCTTTGTAGAT
		3517E3-R24	TAAAATTTCATTTTCATAAACATCAAGATTAATA
		3517E3-R25	GCCCGACATACCCA
BCT3518	ospC	3518E3-F1	TTAATGAAAAAGAATACATTAAGTGCAATAT
		3518E3-F2	CTAATAATTCATAAATAAAAAGGAGGCAC
		3518E3-F3	TTTTCAAATAAAAAATTGAAAAACAAAATTGT
		3518E3-F4	AATATTTATTCAAGATATTGAAGAATTTGAAAAA
		3518E3-F5	TTTAAAATCAAATTAAGACAATATTTTTCAAATTC
		3518E3-F6	AGCATATTTGGCTTTGCTTATG
		3518E3-F7	AAATTAAAACTTTTTTTATTAAAGTATACTTCATTTAA
		3518E3-F8	GCCTGAGTATTCATTATATAAGTCC
		3518E3-F9	TATATTGGGATCCAAAATCTAATACAAG
		3518E3-F10	CAATTTCTCTAATTCTTCTTGCAATTAG
		3518E3-F11	GGAGTATAGTAAGGTATTACTTTTGTATAAA
		3518E3-F12	TTCCTGAGATATTCATATTTTTAATTTCTTTT
		3518E3-F13	GCAGGACTTCCACTTAGTA
		3518E3-F14	GGTAGGAGCTTCTTTTGAATAAAC
		3518E3-F15	CAAAATAGGTATTTTCAAATTAAAAATTTCCATA
		3518E3-F16	AATTTAACAATTATTTGCATTCCATAACATA
		3518E3-F17	GCTTAGAGTCTTTAGATACTAGGC
		3518E3-F18	AAAGATTTCAGAGCTCCCATAT
		3518E3-F19	TTCTGAAAATAAAAGAGATTTTTCATCTC
		3518E3-F20	TGACTCATGATAATTTGAAATTTGTTTG
		3518E3-F21	AAATTATCAGGAATTTTTTCAATACTGTC
		3518E3-F22	GCAATACAATTTTTTGTAAAAGCTAATTG
		3518E3-F23	CCGTAAATTTTTTGAGTTTCATTTGAT
		3518E3-F24	AGTTACTTCTGGATGGAATTGT
		3518E3-F25	AATTTTTAATTATTTGATCACCAAATTCAG
		3518E3-R1	ACCGCATTAGAATCCGTAAT
		3518E3-R2	ACCTCTTTCACAGCAAGTT
		3518E3-R3	CATCTATAGATGACAGCAACG
		3518E3-R4	TTACCAATAGCTTTAGCAGCA
		3518E3-R5	GTATCCAAACCATTATTTTGGTGTA
		3518E3-R6	GCTAACAATGATCCATTGTGATTAT
		3518E3-R7	TATTAGGGTTGATATTGCATAAGC
		3518E3-R8	CTTCATTTTTCAATCCATCTAATTTTTG
		3518E3-R9	TTAGCCGCATCAATTTTTTCC
		3518E3-R10	TCTTTTAATTTATTAGTAAATGTTTCAGAACA
		3518E3-R11	CTTCTTTACCAAGATCTGTGTG
		3518E3-R12	CTTTTGCATCAGCATCAGT
		3518E3-R13	TTTAGTTTTAGTACCATTTGTTTTTAAAATG
		3518E3-R14	GATTCAAATAATTTTCCAAGTTCTTCAG
		3518E3-R15	CTGCTTTTGACAAGACCTC
		3518E3-R16	TTTAACTGAATTAGCAAGCATCTC
		3518E3-R17	CCACAACAGGGCTTG
		3518E3-R18	GATCTTAATTAAGGTTTTTTTGGACTT
		3518E3-R19	CCAGTTACTTTTTTAAAACAAATTAATCTTATA
		3518E3-R20	AGAAATCTTTCTTGACTTATATTGACTTT
		3518E3-R21	GAATTTTAAGAAATTTTTTGAGAAAATAAAAAAATAAAA
		3518E3-R22	TATTCTTTAAGAGAAGAGCTTAAAGTT
		3518E3-R23	AAATTCAATTTATTAACGGCTTTTGTAATA
		3518E3-R24	TCTAGCACCCAATTTTGTTTATATTTA
		3518E3-R25	GTTTAAGCCTACTTAAAGTCTTTAAAATC
BCT3519 and BCT3520	hbb	3519-20E3-F1	CCCACACTCTCTCTTTCAAA
		3519-20E3-F2	GATATTAACCGGCATTTAACCTT
		3519-20E3-F3	TCTAGCTTACAATCCCATTTATAAGA
		3519-20E3-F4	CCTTCAAATTTTAATTTTCCTCTAAAAGTTA
		3519-20E3-F5	CCTTCAAAAGAAGAATCAAGATACAA
		3519-20E3-F6	CACACCCCCTTTTGAAGATA
		3519-20E3-F7	GTAATAACCTTACTATTCTTGCCAATA
		3519-20E3-F8	TTCTACTATTAATGTATCACAAATTACCAC
		3519-20E3-F9	GCATTTACATTGCCCTTCAA
		3519-20E3-F10	CAACCGCTGTTTAAATAAACCTT
		3519-20E3-F11	AATATTTTTTTTGTTTTTACATCCCCATAT
		3519-20E3-F12	CACACTTACCATCAAAAATTATATTATCAT
		3519-20E3-F13	AAGAAAATAAATCTACAATTTCATTAGACTTTA
		3519-20E3-F14	CAAAGTATCTTTTATTTGTGAAACGG
		3519-20E3-F15	TCTACTTATTATTAATTAATAAAAAACACTGACC
		3519-20E3-F16	CTCTACGAATTAAATTTTTAAGAAAGGATTTTA
		3519-20E3-F17	ATCAAATCCACCATTTTTTTTATCCA
		3519-20E3-F18	CCAACCGCCTTATTTCAC
		3519-20E3-F19	TTTTCAAATTATCTTCAATCTTAAACTCTTTAG
		3519-20E3-F20	TTTTAGCAACAACTTTAACCACTTT
		3519-20E3-F21	TGTCACGCTAGATGCAG
		3519-20E3-F22	CTTTACGCCACTTAAATCTGC
		3519-20E3-F23	AATCAGAAAATATTACCCCGTTTG
		3519-20E3-F24	ATATTATTTTCTAAACCTGAAGAAGGAATAT
		3519-20E3-F25	CATTAAAAAATTTGATGATATTACTTTGCTC
		3519-20E3-R1	GTTTTGCTGTTAAAGTAAGGAAATTAG
		3519-20E3-R2	GCTGCTAGAAAAAAATCTCGTT
		3519-20E3-R3	CTGCTAGAAAGCGAATAATTCATAA
		3519-20E3-R4	GAATTTTTTAAATTTGTTGCAAAAAAACTAG
		3519-20E3-R5	GCGGGTAAGAAAGACGAA
		3519-20E3-R6	GAAAAACGCTGTATCAACATGA
		3519-20E3-R7	ATTAGAAATGTAAGTGTAAAAAGTGAATTAAAA
		3519-20E3-R8	CGCTCTCGTCAAAATTTAAAAAG
		3519-20E3-R9	CTTGAGAAAAAATGCATCTGC
		3519-20E3-R10	GATATATTAAAGCTATTGTTTAATAATATTATTAAGGA
		3519-20E3-R11	ATTAACTTAAATCTTTGATTGACTATATTTGAAT
		3519-20E3-R12	AGGTTTTTGAATATATTAATCAAAACTATTGT
		3519-20E3-R13	ATTTTGAATAAAAAAATTTCTTATTCCATGC
		3519-20E3-R14	CAAAGAAAATCATCAGACAAAAAAGG
		3519-20E3-R15	GAATTTGAATTTAACAATAAAAATTATTTATGCTT
		3519-20E3-R16	GAATTTTTTGAAAAAATTTTTATTGCCAG
		3519-20E3-R17	CTGTGAAAGAAAAATTTTTAAAAGTGAAAT
		3519-20E3-R18	CAATATAGTGTTATTTTATGAGTTTAGGAAAG
		3519-20E3-R19	TTTTGTTGGGGGATTTTTCAG
		3519-20E3-R20	TTTTGTTGGGGGATTTTTCAG
		3519-20E3-R21	GCAATATATTTATTTTTTTATTTATTTGTTTTATTGATATTA
		3519-20E3-R22	GTATTATGATTGCTTTATTTGTTTATTACATTTC
		3519-20E3-R23	GATATTATTTATCTTGTACTTATCTTTTTATGTTTT
		3519-20E3-R24	GTCCCAAAATTGGAAAATTTTCC
		3519-20E3-R25	TATTTAAAGAGCTTAAAATTAAGAGAAAAGATC
BCT3511	gyrB	3511E3-F1	CGTGAAGCTGCAAGAAAA
		3511E3-F2	TGGAAAAGCAATAAAAGCTGCTG
		3511E3-F3	TGTTGTATATGAACATTTATTGGAAAT
		3511E3-F4	GCTTGGTAATTCTGAGATAAGAAA
		3511E3-F5	CCTCAATTTGAAGGTCAAACAAA
		3511E3-F6	ATTTTAAAGAGGGGCTTACAGCT
		3511E3-F7	GCCATGAATGAAGCTTTTAAA
		3511E3-F8	CTCATGTTATGGGATTTAGAAGTGG
		3511E3-F9	CTGACAACATTCTTTCTTTTGTTAA
		3511E3-F10	TGTTAATGTGGGGCTTAAATG
		3511E3-F11	GCTTTTCAATCAGAACCTTATT
		3511E3-F12	GAGGGTGGGATAAAATCTTTTT
		3511E3-F13	TGGTAAAGAAAAATCTTCAAAATTTTAT
		3511E3-F14	CGATAAAATATACATTTCAATTGAAGATAA
		3511E3-F15	GGCTTAAAGAGCTTGCTTTT
		3511E3-F16	AGATTATAATTTCGATGTTCTTGAAAAA
		3511E3-F17	CGGATTCTGAAATTTTTGAAACTTT
		3511E3-F18	GGGGACTAAGGTTACTTTTTT
		3511E3-F19	AGAAGTTGTGGGGGAATCTTCTGTT
		3511E3-F20	CTTTTTCAAAAGGTATTCCGACTT
		3511E3-F21	GGTTTATGTTAATAGAGATGGAAAAAT
		3511E3-F22	GGTTGTAAATGCTCTATCTTCGTT
		3511E3-F23	TGGTAAGTTTAATAAAGGCACGTAT
		3511E3-F24	CCTTGAACTTGTTTTAACAAAATTAC
		3511E3-F25	ACCGATATTCATGAAGAGGAG
		3511E3-R1	TACCCATTTTAGCACTTCCTCCA
		3511E3-R2	TGGCAAAATGGCCTGAAAAA
		3511E3-R3	TTGTTTTCTCAACATTAAGCATTTT
		3511E3-R4	ATCATTGGTGATAACCTTATCTTCT
		3511E3-R5	ACTCCTGCACCAAGAGAT
		3511E3-R6	ATCTTGTGATAACGAAGTTTTGTA
		3511E3-R7	TCCATCAACATCGGCATCTG
		3511E3-R8	AAAAGCTAAAAGCAAAGTTCTAAT
		3511E3-R9	ATATATCCATTTTCAATTAAATCTCTCAT
		3511E3-R10	TATAAAGAGGAGGCATGGCT
		3511E3-R11	TAAAAATAATAAATACGATTGTCATACTTT
		3511E3-R12	TATTGCGATTTTTAGTTTCAATAGAA
		3511E3-R13	CCCAAGCCCTTTATATCTCTGAA
		3511E3-R14	AGCTGCGTTGGATTCATC
		3511E3-R15	CTAGCAGGATCCATAGTTGTTT
		3511E3-R16	ATCATCTATATTCATCAATCTCATTTTT
		3511E3-R17	GAGTAACAAAAATTTTTTCAGCTTCA
		3511E3-R18	TTTCTGGGCTCAACTAAATCT
		3511E3-R19	GATTAATTACATTAAGTGCATTCTGTTC
		3511E3-R20	CCATTAACGCTCCAATTACAC
		3511E3-R21	TCCTAACATTTAATATTTGTTCTTTATTTTC
		3511E3-R22	GCATAATTTAAATAAGAAGTTTTTATTTCATCT
		3511E3-R23	GAAGAGCTCTAGAAACAATAACTGA
		3511E3-R24	TGGTTTAAGACCATCTCTTACGT
		3511E3-R25	CTCATACATAGAATAAAGTATTCTCCTG
