# Supplementary material for: Direct Molecular Detection and Genotyping of Borrelia burgdorferi from Whole Blood of Patients with Early Lyme Disease
Source: PLoS One. 2012 May 8;7(5):e36825. doi: 10.1371/journal.pone.0036825 (PMC3348129; doi:10.1371/journal.pone.0036825)
Supplement: Table S2 — Genotypic, and serological analysis of specimens by IA/PCR/ESI-MS. Results of PCR, IA/PCR, and 2-tier serology by patient ID. If IA/PCR was positive the number of primers detecting is given in parenthesis. ND = Not determined; NA = Not applicable; IC = Incomplete genotype signature; Control samples are prefixed with “C”. (XLSX) [file pone.0036825.s002.xlsx]

## Sheet: Table S2
Table S2. Genotypic, and serological analysis of specimens by IA/PCR/ESI-MS.
ID	PCR	IA/PCR		Early 2-tier				Follow-up 2-tier				EM
	Result	Result	Genotype	Result	ELISA	# IgM bands	# IgG bands	Result	ELISA	# IgM bands	# IgG bands	Multiple EM
1	Neg	Pos (8)	1	Neg	≤0.90	-	-	Pos	4.35	3	1	No
2	Neg	Pos (8)	33	Pos	>5.00	3	4	ND	-	-	-	Yes
3	Neg	Pos (8)	76	Neg	1	1	3	Pos	>5.00	3	5	No
4	Neg	Pos (7)	IC	Pos	>5.00	3	4	ND	-	-	-	Yes
5	Neg	Pos (6)	IC	Neg	≤0.90	-	-	Pos	>5.00	3	6	Yes
6	Neg	Pos (6)	IC	Neg	1.36	1	1	Pos	>5.00	2	2	No
7	Neg	Pos (8)	22	Pos	>5.00	3	1	ND	-	-	-	Yes
8	Neg	Pos (8)	7	Pos	>5.00	3	4	ND	-	-	-	No
9	Neg	Pos (8)	7	Neg	≤0.90	-	-	Neg	1.46	1	2	No
10	Neg	Pos (1)	IC	Pos	2.49	2	0	ND	-	-	-	Yes
11	Pos (1)	Pos (8)	10	Neg	4.49	1	3	Pos	>5.00	2	4	No
12	Neg	Pos (8)	6	Pos	3.54	2	3	ND	-	-	-	No
13	Pos (3)	Pos (8)	6	Pos	4.73	3	2	ND	-	-	-	Yes
14	Neg	Pos (3)	IC	Pos	2.86	2	2	ND	-	-	-	Yes
15	Neg	Neg	-	Neg	≤0.90	-	-	ND	-	-	-	No
16	Neg	Neg	-	Neg	≤0.90	-	-	Neg	≤0.90	-	-	Yes
17	Neg	Neg	-	Pos	3.47	2	1	ND	-	-	-	Yes
18	Neg	Neg	-	Neg	≤0.90	-	-	Neg	≤0.90	-	-	Yes
19	Neg	Neg	-	Neg	3.51	1	2	Pos	3.32	2	4	No
20	Neg	Neg	-	Neg	≤0.90	-	-	Neg	-	-	-	No
21	Neg	Neg	-	Pos	>5.00	3	2	ND	-	-	-	No
22	Neg	Neg	-	Pos	>5.00	2	5	ND	-	-	-	Yes
23	Neg	Neg	-	Neg	≤0.90	-	-	Pos	4.33	2	2	No
24	Neg	Neg	-	Pos	4.27	2	1	ND	-	-	-	No
25	Neg	Neg	-	Neg	2.11	1	0	Neg	2.64	2	1	No
26	Neg	Neg	-	Pos	4.16	3	3	ND	-	-	-	Yes
27	Neg	Neg	-	Pos	>5.00	2	1	ND	-	-	-	Yes
28	Neg	Neg	-	Neg	≤0.90	-	-	Neg	1.14	0	2	No
29	Neg	Neg	-	Neg	≤0.90	-	-	NEG	0.91	2	0	No
C1	Neg	Neg	-	Neg	-	-	-	ND	-	-	-	NA
C2	Neg	Neg	-	Neg	-	-	-	ND	-	-	-	NA
C3	Neg	Neg	-	Neg	-	-	-	ND	-	-	-	NA
C4	Neg	Neg	-	Neg	-	-	-	ND	-	-	-	NA
C5	Neg	Neg	-	Neg	-	-	-	ND	-	-	-	NA
C6	Neg	Neg	-	Neg	-	-	-	ND	-	-	-	NA
C7	Neg	Neg	-	Neg	-	-	-	ND	-	-	-	NA
C8	Neg	Neg	-	Neg	-	-	-	ND	-	-	-	NA
C9	Neg	Neg	-	Neg	-	-	-	ND	-	-	-	NA
C10	Neg	Neg	-	Neg	-	-	-	ND	-	-	-	NA
C11	Neg	Neg	-	Neg	-	-	-	ND	-	-	-	NA
C12	Neg	Neg	-	Neg	-	-	-	ND	-	-	-	NA
C13	Neg	Neg	-	Neg	-	-	-	ND	-	-	-	NA
C14	Neg	Neg	-	Neg	-	-	-	ND	-	-	-	NA
C15	Neg	Neg	-	Neg	-	-	-	ND	-	-	-	NA
C16	Neg	Neg	-	Neg	-	-	-	ND	-	-	-	NA
C17	Neg	Neg	-	Neg	-	-	-	ND	-	-	-	NA
C18	Neg	Neg	-	Neg	-	-	-	ND	-	-	-	NA
C19	Neg	Neg	-	Neg	-	-	-	ND	-	-	-	NA
C20	Neg	Neg	-	Neg	-	-	-	ND	-	-	-	NA
C21	Neg	Neg	-	Neg	-	-	-	ND	-	-	-	NA
C22	Neg	Neg	-	Neg	-	-	-	ND	-	-	-	NA
C23	Neg	Neg	-	Neg	-	-	-	ND	-	-	-	NA
C24	Neg	Neg	-	Neg	-	-	-	ND	-	-	-	NA
C25	Neg	Neg	-	Neg	-	-	-	ND	-	-	-	NA
C26	Neg	Neg	-	Neg	-	-	-	ND	-	-	-	NA
C27	Neg	Neg	-	Neg	-	-	-	ND	-	-	-	NA
C28	Neg	Neg	-	Neg	-	-	-	ND	-	-	-	NA
C29	Neg	Neg	-	Neg	-	-	-	ND	-	-	-	NA
C30	Neg	Neg	-	Neg	-	-	-	ND	-	-	-	NA
C31	Neg	Neg	-	Neg	-	-	-	ND	-	-	-	NA
C32	Neg	Neg	-	Neg	-	-	-	ND	-	-	-	NA
C33	Neg	Neg	-	Neg	-	-	-	ND	-	-	-	NA
C34	Neg	Neg	-	Neg	-	-	-	ND	-	-	-	NA
C35	Neg	Neg	-	Neg	-	-	-	ND	-	-	-	NA
C36	Neg	Neg	-	Pos	5	0	7	ND	-	-	-	NA
C37	Neg	Neg	-	Neg	-	-	-	ND	-	-	-	NA
C38	Neg	Neg	-	Neg	-	-	-	ND	-	-	-	NA
C39	Neg	Neg	-	Neg	-	-	-	ND	-	-	-	NA
C40	Neg	Neg	-	Neg	-	-	-	ND	-	-	-	NA
C41	Neg	Neg	-	Neg	-	-	-	ND	-	-	-	NA
C42	Neg	Neg	-	Neg	-	-	-	ND	-	-	-	NA
C43	Neg	Neg	-	Neg	-	-	-	ND	-	-	-	NA
C44	Neg	Neg	-	Neg	-	-	-	ND	-	-	-	NA
ND = Not determined; NA = Not applicable; IC = Incomplete genotype signature; Control samples are prefixed with C
If IA/PCR was positive the number of primers detecting is given in parenthesis
